# Supplementary material for: C10ORF10/DEPP-mediated ROS accumulation is a critical modulator of FOXO3-induced autophagy
Source: PubMed Central journal article supplement (PMC5445297; doi:10.1186/s12943-017-0661-4), 2017-05-25

a)

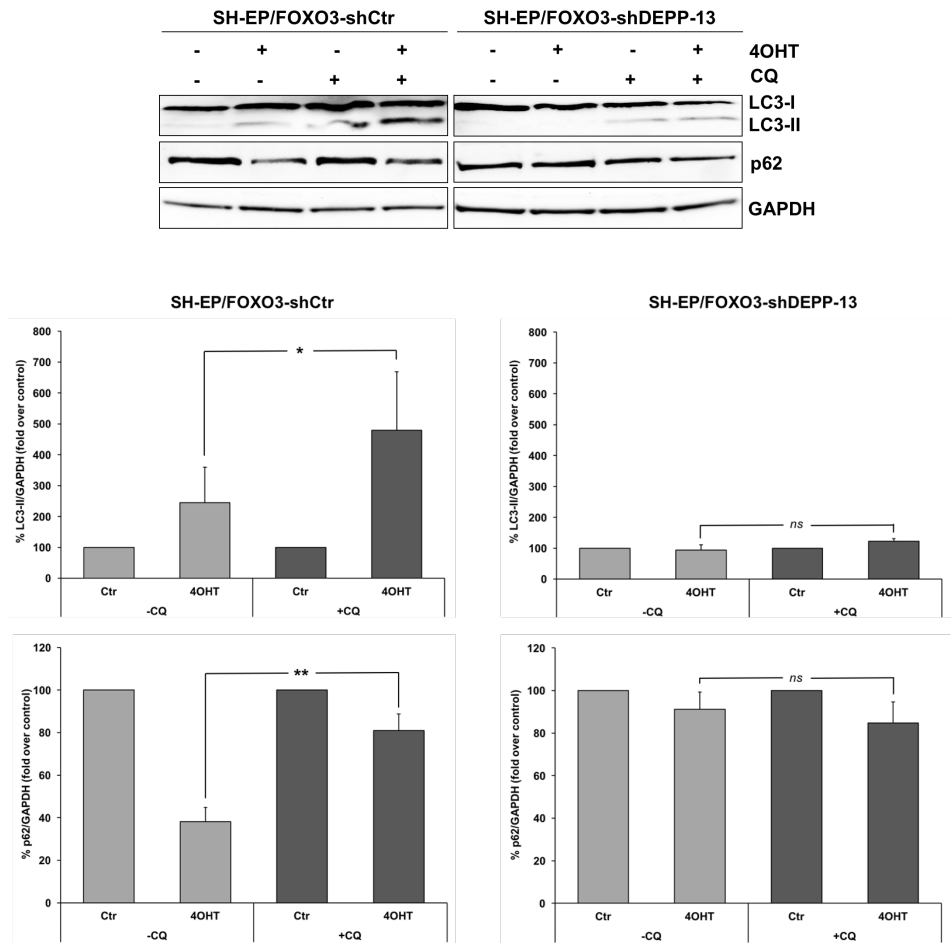

b)

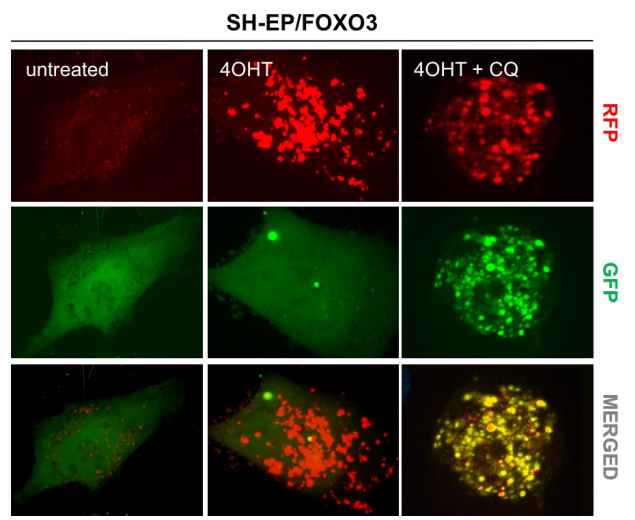

Supplement: 12943_2017_661_MOESM2_ESM.pdf [file 12943_2017_661_MOESM2_ESM.pdf]
